# Supplementary material
Source: Springer Nature journal article supplement (https://www.springermedizin.de/resource/supplementary/12885_2007_1094_MOESM2_ESM.pdf/9471102)

# Gene

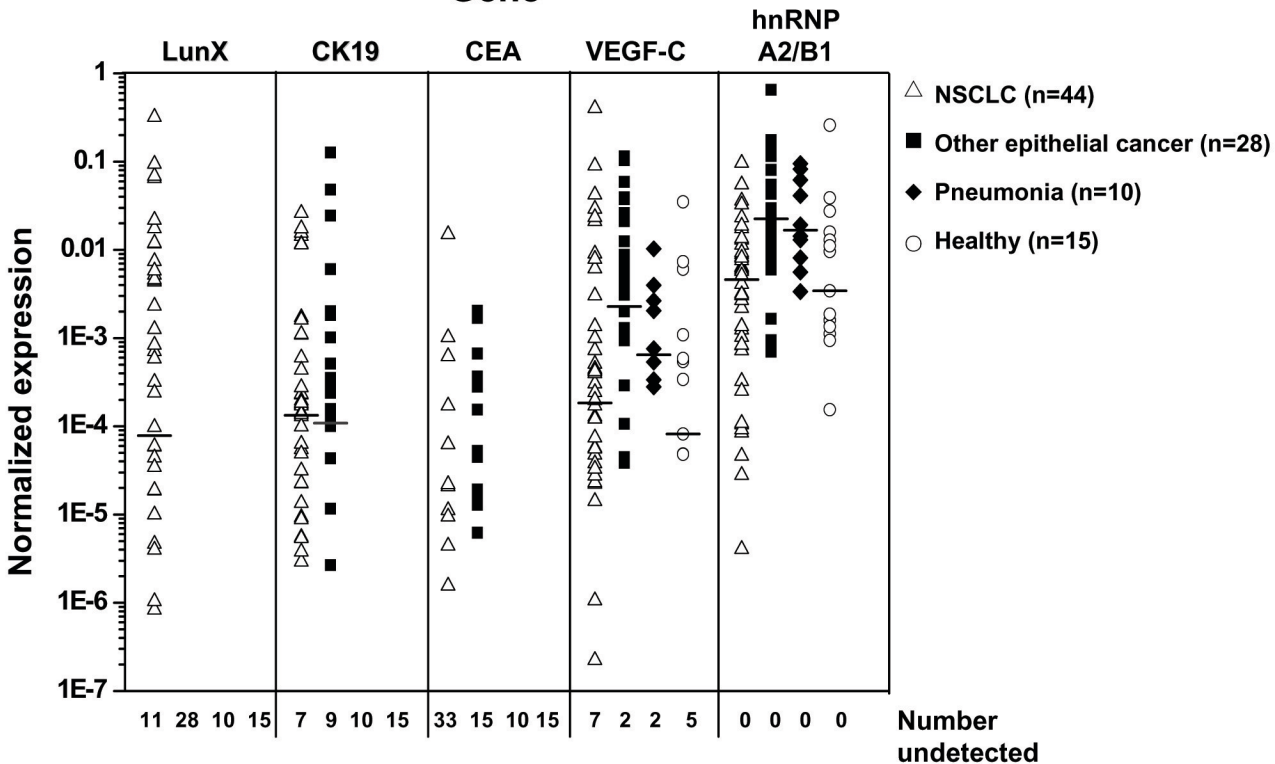

Supplement: MOESM2 [file 9471102]
